# Supplementary material for: Soil organic carbon stocks did not change after 130 years of afforestation on a former Swiss Alpine pasture
Source: Copernicus journal article supplement (doi:10.5194/soil-9-609-2023), 2023-12-07
Supplement: Supplementary file 1 [file soil-9-609-2023-supplement.pdf]

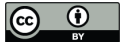

*Supplement of*

## **Soil organic carbon stocks did not change after 130 years of afforestation on a former Swiss Alpine pasture**

**Tatjana C. Speckert et al.**

*Correspondence to:* Tatjana C. Speckert ([tatjanacarina.speckert@geo.uzh.ch](mailto:tatjanacarina.speckert@geo.uzh.ch))

The copyright of individual parts of the supplement might differ from the article licence.

Table S1. Bulk density of mineral soil samples (n= 5 for pasture; n= 3 for forest). Values are average  $\pm$  SE (\*\*Average  $\pm$  SE of the individual plots; n= 5 for pasture; n= 3 for forest).

| Mineral soil | Bulk density [g cm <sup>-3</sup> ] |                 |                 |                 |
|--------------|------------------------------------|-----------------|-----------------|-----------------|
|              | Pasture                            | Forest          |                 |                 |
|              |                                    | 40-year-old     | 55-year-old     | 130-year-old    |
| 0-5cm        | 0.87 $\pm$ 0.04                    | 0.76 $\pm$ 0.02 | 0.83 $\pm$ 0.09 | 0.86 $\pm$ 0.04 |
| 5-10cm       | 0.95 $\pm$ 0.03                    | 0.86 $\pm$ 0.03 | 0.90 $\pm$ 0.07 | 0.83 $\pm$ 0.07 |
| 10-15cm      | 1.00 $\pm$ 0.02                    | 1.04 $\pm$ 0.01 | 1.04 $\pm$ 0.02 | 1.04 $\pm$ 0.04 |
| 15-20cm      | 1.05 $\pm$ 0.04                    | 1.11 $\pm$ 0.04 | 1.11 $\pm$ 0.06 | 1.14 $\pm$ 0.02 |
| 20-25cm      | 1.12 $\pm$ 0.03                    | 1.17 $\pm$ 0.03 | 1.11 $\pm$ 0.04 | 1.19 $\pm$ 0.03 |
| 25-30cm      | 1.12 $\pm$ 0.03                    | 1.28 $\pm$ 0.00 | 1.17 $\pm$ 0.04 | 1.25 $\pm$ 0.05 |
| 30-35cm      | 1.15 $\pm$ 0.04                    | 1.22 $\pm$ 0.00 | 1.22 $\pm$ 0.02 | 1.26 $\pm$ 0.04 |
| 35-40cm      | 1.14 $\pm$ 0.06                    | 1.20 $\pm$ 0.00 | 1.24 $\pm$ 0.01 | 1.21 $\pm$ 0.05 |
| 40-45cm      | 1.16 $\pm$ 0.06                    | 1.18 $\pm$ 0.00 | 1.19 $\pm$ 0.03 | 1.23 $\pm$ 0.02 |
| **Average    | 1.05 $\pm$ 0.02                    | 1.08 $\pm$ 0.04 | 1.09 $\pm$ 0.03 | 1.10 $\pm$ 0.03 |

Table S2. Composition of the Oi horizon of each forest age (40-, 55-, and 130-years-old; n.a. = not available).

| Residues [mass - %]   | 40-year-old forest | 55-year-old forest | 130-year-old forest |
|-----------------------|--------------------|--------------------|---------------------|
| Branches              | 24.0               | 16.4               | 16.2                |
| Spruce cones          | 32.5               | 64.3               | 58.2                |
| Spruce needles        | 24.5               | 3.9                | 7.5                 |
| Moss                  | 1.2                | n.a.               | 0.2                 |
| Grass residues        | n.a.               | n.a.               | 2.3                 |
| Arbuscular mycorrhiza | 4.3                | n.a.               | n.a.                |

Table S3. Root biomass and root frequency (counted in the field) of pasture and forest areas (40-, 55-, and 130-years old). Values are mean values  $\pm$  SE (n= 5 for pasture; n= 3 for forest, \* Sum  $\pm$  SE (0-45cm) (n.a. = not available).

| Mineral soil | Fine (0-2mm) root biomass [g m <sup>-2</sup> ] |                     |                     |                     | Coarse (2-5mm) root biomass [g m <sup>-2</sup> ] |                     |                     |                     |
|--------------|------------------------------------------------|---------------------|---------------------|---------------------|--------------------------------------------------|---------------------|---------------------|---------------------|
|              | Pasture                                        | Forest              |                     |                     | Pasture                                          | Forest              |                     |                     |
|              |                                                | 40-year-old         | 55-year-old         | 130-year-old        |                                                  | 40-year-old         | 55-year-old         | 130-year-old        |
| 0-5cm        | 87.7 $\pm$ 26.9                                | 1.3 $\pm$ 0.4       | 1.4 $\pm$ 0.4       | 0.7 $\pm$ 0.2       | 55.2 $\pm$ 20.9                                  | 225.4 $\pm$ 62.9    | 135.6 $\pm$ 21.5    | 178.1 $\pm$ 81.1    |
| 5-10cm       | 27.2 $\pm$ 10.5                                | 4.8 $\pm$ 3.6       | 0.4 $\pm$ 0.3       | 2.9 $\pm$ 1.9       | 197.9 $\pm$ 183.0                                | 117.0 $\pm$ 32.1    | 78.3 $\pm$ 15.0     | 222.3 $\pm$ 61.1    |
| 10-15cm      | 19.6 $\pm$ 3.6                                 | 4.6 $\pm$ 1.9       | 0.9 $\pm$ 0.8       | 3.4 $\pm$ 3.1       | 189.0 $\pm$ 131.5                                | 74.8 $\pm$ 17.5     | 40.3 $\pm$ 10.8     | 77.4 $\pm$ 26.7     |
| 15-20cm      | 38.0 $\pm$ 23.1                                | 2.2 $\pm$ 1.2       | n.a.                | 3.3 $\pm$ 2.6       | 5.8                                              | 87.5 $\pm$ 58.8     | 59.3 $\pm$ 7.6      | 80.4 $\pm$ 61.9     |
| 20-25cm      | 3.5 $\pm$ 0.9                                  | 2.5 $\pm$ 1.5       | 0.1                 | 0.2 $\pm$ 0.1       | 27.8                                             | 15.6 $\pm$ 3.8      | 13.7 $\pm$ 2.9      | 18.0 $\pm$ 11.9     |
| 25-30cm      | 4.3 $\pm$ 0.9                                  | 0.5 $\pm$ 1.2       | 0.1                 | 1.1 $\pm$ 0.6       | 27.4 $\pm$ 22.1                                  | 59.8 $\pm$ 18.7     | 16.8 $\pm$ 9.1      | 13.3 $\pm$ 6.4      |
| 30-35cm      | 3.5 $\pm$ 1.2                                  | 0.4 $\pm$ 0.0       | n.a.                | 0.9 $\pm$ 0.4       | 96.8                                             | 34.6 $\pm$ 3.8      | 4.8 $\pm$ 0.2       | 32.3 $\pm$ 17.5     |
| 35-40cm      | 1.4 $\pm$ 0.4                                  | 0.3                 | n.a.                | 1.0 $\pm$ 0.1       | n.a.                                             | 16.7 $\pm$ 0.1      | 2.8 $\pm$ 0.9       | 36.0 $\pm$ 11.9     |
| 40-45cm      | 1.7 $\pm$ 0.6                                  | n.a.                | n.a.                | 1.1 $\pm$ 0.8       | n.a.                                             | 22.2 $\pm$ 10.5     | 4.1 $\pm$ 2.6       | 34.0 $\pm$ 22.7     |
| *Sum         | 184.9 $\pm$ 39.5                               | 16.1 $\pm$ 6.1      | 2.9 $\pm$ 1.4       | 12.1 $\pm$ 7.5      | 274.2 $\pm$ 209.2                                | 640.7 $\pm$ 140.4   | 349.5 $\pm$ 31.3    | 683.5 $\pm$ 202.1   |
| Mineral soil | Fine (0-2mm) root frequency [m <sup>-2</sup> ] |                     |                     |                     | Coarse (2-5mm) root frequency [m <sup>-2</sup> ] |                     |                     |                     |
|              | Pasture                                        | Forest              |                     |                     | Pasture                                          | Forest              |                     |                     |
|              |                                                | 40-year-old         | 55-year-old         | 130-year-old        |                                                  | 40-year-old         | 55-year-old         | 130-year-old        |
| 0cm          | 7'478.4 $\pm$ 1'150.6                          | 1'924.0 $\pm$ 285.2 | 880.0 $\pm$ 36.7    | 845.3 $\pm$ 201.6   | n.a.                                             | 717.3 $\pm$ 22.8    | 870.7 $\pm$ 264.7   | 334.7 $\pm$ 116.9   |
| 10cm         | 5'079.2 $\pm$ 736.5                            | 854.7 $\pm$ 212.5   | 541.3 $\pm$ 121.8   | 910.7 $\pm$ 141.6   | n.a.                                             | 438.7 $\pm$ 22.5    | 366.7 $\pm$ 67.7    | 545.3 $\pm$ 61.5    |
| 20cm         | 2'991.2 $\pm$ 759.9                            | 610.7 $\pm$ 22.7    | 368.0 $\pm$ 49.1    | 469.3 $\pm$ 89.3    | n.a.                                             | 276.0 $\pm$ 22.8    | 233.3 $\pm$ 58.3    | 320.0 $\pm$ 22.8    |
| 30cm         | 1'229.6 $\pm$ 339.0                            | 436.0 $\pm$ 80.9    | 129.3 $\pm$ 2.2     | 346.7 $\pm$ 87.7    | n.a.                                             | 310.7 $\pm$ 42.5    | 141.3 $\pm$ 19.4    | 264.0 $\pm$ 60.7    |
| 40cm         | 1'729.0 $\pm$ 814.5                            | 1'646.0             | 98.7 $\pm$ 23.3     | 68.0 $\pm$ 13.2     | n.a.                                             | 628.0 $\pm$ 202.7   | 88.0 $\pm$ 22.3     | 168.0 $\pm$ 42.8    |
| *Sum         | 15'761.3 $\pm$ 4'422.4                         | 5'320.0 $\pm$ 623.8 | 2'017.3 $\pm$ 151.3 | 2'640.0 $\pm$ 504.9 | n.a.                                             | 2'370.7 $\pm$ 225.6 | 1'700.0 $\pm$ 377.9 | 1'632.0 $\pm$ 260.8 |

Table S4. Obtained t- and p-values from the liner-mixed model (*nmle* package) for SOC and TN stock in relation to soil depth and different forest age.

| Mineral soil depth | SOC stock [kg m <sup>-2</sup> ] |                      | TN stock [kg m <sup>-2</sup> ] |                      |
|--------------------|---------------------------------|----------------------|--------------------------------|----------------------|
|                    | t-value                         | p-value              | t-value                        | p-value              |
| 0-5cm              | -1.33                           | 2.05e <sup>-17</sup> | -1.51                          | 0.089                |
| 5-10cm             | -1.37                           | 0.174                | -0.34                          | 0.025                |
| 10-15cm            | -4.30                           | 4.02e <sup>-05</sup> | -1.55                          | 0.123                |
| 15-20cm            | -5.30                           | 7.08e <sup>-07</sup> | -2.58                          | 0.011                |
| 20-25cm            | -5.26                           | 8.49e <sup>-07</sup> | -3.33                          | 0.001                |
| 25-30cm            | -5.24                           | 9.36e <sup>-07</sup> | -3.13                          | 0.002                |
| 30-35cm            | -6.07                           | 2.40e <sup>-08</sup> | -4.38                          | 3.24e <sup>-04</sup> |
| 35-40cm            | -7.07                           | 2.33e <sup>-10</sup> | -5.41                          | 2.2e <sup>-06</sup>  |
| 40-45cm            | -7.17                           | 1.44e <sup>-10</sup> | -5.59                          | 1.0e <sup>-07</sup>  |

Table S5. Obtained t- and p-values from the liner-mixed model (*nmle* package) for the  $\delta^{13}\text{C}$  values as well as for the C:N ratio in the mineral soil in relation to soil depth and different forest age. In bold is the significant change in the  $\delta^{13}\text{C}$  values in the subsoil (30-45cm) of the different forest ages, as well as the change in the C:N ratio between 10 and 20cm (mentioned in the discussion) of the different forest ages.

| Mineral soil depth | $\delta^{13}\text{C}$ [‰ V-PDB] |                | C:N ratio |                      |
|--------------------|---------------------------------|----------------|-----------|----------------------|
|                    | t-value                         | p-value        | t-value   | p-value              |
| 0-5cm              | 2.06                            | 0.108          | 13.23     | 1.57e <sup>-23</sup> |
| 5-10cm             | 0.52                            | 0.607          | -0.20     | 0.842                |
| 10-15cm            | 2.42                            | 0.017          | -2.61     | <b>0.011</b>         |
| 15-20cm            | 1.87                            | 0.065          | -2.83     | <b>0.006</b>         |
| 20-25cm            | 2.87                            | 0.005          | -1.93     | 0.057                |
| 25-30cm            | 3.14                            | 0.002          | -2.15     | 0.034                |
| 30-35cm            | 4.17                            | <b>7.0e-05</b> | -1.75     | 0.083                |
| 35-40cm            | 4.51                            | <b>2.0e-05</b> | -2.05     | 0.043                |
| 40-45cm            | 5.88                            | <b>3.0e-07</b> | -1.56     | 0.121                |
